# Supplementary material for: Systemic immune inflammation index is a valuable marker for predicting hemodialysis patients with depression: a cross-sectional study
Source: Front Psychiatry. 2024 Aug 5;15:1423200. doi: 10.3389/fpsyt.2024.1423200 (PMC11331312; doi:10.3389/fpsyt.2024.1423200)
Supplement: Supplementary file 1 [file Table_1.xlsx]

## Sheet: Sheet1
depression	HADS-D		SII quartile	Age	Sex	BMI	Education	marital status	monthly income	smoking	drinking	Dialysis duration	Primary disease	HADS-A	DUREL	NRUT	LYMPH	MON	PLT	WBC	HGB	NLR	MLR	PLR	CREA	BUN	UA	GLU	ALP	TP	ALB	PAB	TC	TG	LDL	HDL	Fer	Ca	P	iPTH	Na	Cl	K	Mg	hsCRP	CO2	CRP
0	6	730.811	3	42	0	20.3	15	3	3	0	0	8	1	3	11	4.16	1.48	0.52	260	6.55	106	2.81081	0.351351	175.676	486	15.03	322	11.62	326	75.8	34.6	247	4.57	0.51			1144.6	2.23	1.89	514.8	135.9	100.6	4.28	1.01	4.78	22.3	4.78
0	7	718.2	3	79	1	23.5	5	2	3	0	0	48	1	6	18	3.42	0.7	0.47	147	4.7	123	4.88571	0.671429	210	421	14.81	266	17.96	99	71.5	35.1	230	3.3	2.35			193	2.43	1.77	668.5	135.8	99.5	4.46	0.98	5.58	20.8	5.58
0	4	578.378	2	71	1	16.4	9	4	2	0	0	6	6	2	5	4.28	1.11	0.39	150	5.89	66	3.85586	0.351351	135.135	653	16.66	600	5.56	73	67	36.2	329	3.97	2.03			702.9	2.12	2.56	393.8	139.7	99.4	5.78	1.18	2.02	24.3	2.02
0	7	256.296	1	64	0	21.1	9	2	2	0	0	8	1	0	5	3.46	0.54	0.27	40	4.48	118	6.40741	0.5	74.0741	922	31.99	507	13.47	87	72.8	42.9	323	2.59	2.24			375.8	2.03	2.38	375.9	141.1	102.8	5.15	0.85	1.74	21.8	1.74
0	5	387.473	1	56	1	23.7	14	2	3	1	1	12	1	6	11	4.1	1.82	0.38	172	6.53	121	2.25275	0.208791	94.5055	697	25.76	393	7.75	81	76.1	41.3	336	5.14	3.74			692.5	2.32	2.54	461.8	136.7	96.4	6.73	0.84	1.03	22.4	1.03
0	6	553.51	2	60	0	25	9	2	3	1	0	60	1	3	5	5.73	1.47	0.5	142	7.92	129	3.89796	0.340136	96.5986	1075	30.03	445	15.13	73	71.2	40.8	261	2.38	1.63			28.3	2.15	2.37	384	138.6	95	5.97	0.93	0.43	26.5	0.43
0	5	274.81	1	72	1	28.9	12	2	1	0	0	27	1	2	5	2.97	1.74	0.48	161	5.35	121	1.7069	0.275862	92.5287	830	28.22	405	6.35	84	74.8	40.1	332	5.6	3			35.4	2.27	3.29	624.8	141.2	96.7	6.61	1.08	4.42	23.6	4.42
0	0	502.261	2	78	1	24	15	2	3	0	0	49	6	0	13	6.29	1.34	0.56	107	8.31	131	4.69403	0.41791	79.8507	706	28.93	426	6.51	127	70.9	38	260	4.19	3.73			1520.2	1.92	1.95	497.4	141.3	104	4.79	0.82	5.69	20.8	5.69
0	7	765.614	3	53	0	24.1	5	2	1	0	0	12	1	1	5	3.57	0.83	0.36	178	4.98	125	4.30121	0.433735	214.458	875	19.45	428	7.8	115	68.2	38.3	288	3.11	2.21			1402	1.86	1.62	556.8	143.1	109.6	5.15	0.93	4.08	20.5	4.08
0	1	1466.48	4	69	1	22.9	12	2	3	0	0	180	3	0	11	4.45	0.88	0.31	290	5.87	85	5.05682	0.352273	329.545	1057	28.93	385	6.61	121	69.9	37.1	240	5.29	1.44			84.7	1.94	2.59	1409.2	139.5	103.2	4.95	0.96	22.78	18.9	22.78
0	6	911.912	3	50	0	19.4	13	3	3	1	0	30	1	0	21	5.85	0.68	0.44	106	7.19	131	8.60294	0.647059	155.882	688	28.63	393	17.66	124	65.4	37.4	217	3.64	0.88			692.5	2	1.56	315.4	135.9	99.7	4.6	0.76	7.64	21.6	7.64
0	5	466.905	1	55	1	23.4	13	2	2	0	0	288	2	1	27	3.49	1.48	0.39	198	5.19	101	2.35811	0.263514	133.784	883	34.47	284	7.48	62	78	41.5	466	4.66	4.89			1300	2.31	1.7	104.3	138.7	97.4	4.64	1.14	6.9	6.9	6.9
0	6	456.897	1	60	1	24.8	9	2	1	0	0	132	1	0	5	3.88	1.07	0.26	126	5.31	100	3.62617	0.242991	117.757	1044	31.37	524	8.25	74	64.4	38.6	285	3.95	4.11			1445.4	1.86	2.46	1116.4	139.1	96.6	4.58	0.99	5.54	21.4	5.54
0	5	410.75	1	59	0	17.6	12	2	3	1	1	240	2	7	5	3.71	0.84	0.37	93	5.11	117	4.41667	0.440476	110.714	750	27.07	459	7.31	101	59.4	32.8	344	6.1	1.46			1074.6	1.96	1.36	216.7	140.9	100.5	3.68	0.97	3.93	23.3	3.93
0	6	309.327	1	60	1	24	12	2	3	0	0	13	2	0	7	3.55	1.71	0.32	149	5.67	111	2.07602	0.187135	87.1345	1030	36.68	378	4.98	84	72.7	38.8	344	4.45	3.74			1060.9	2.51	1.69	440.3	137.8	99.4	5.45	1.2	0.82	21.1	0.82
0	2	287.583	1	50	1	20.1	12	2	3	0	0	13	2	0	5	2.03	0.6	0.21	85	2.94	122	3.38333	0.35	141.667	984	30.66	527	8.57	34	68.3	35.6	247	2.66	2.11			1441.5	2.04	3.24	209.3	137.3	98.4	4.4	1.11	6.16	19	6.16
0	3	808.333	3	62	1	20.2	12	2	2	0	0	24	1	0	5	4.75	1.71	0.38	291	7.3	112	2.77778	0.222222	170.175	874	34.17	667	17.23	172	73.7	39.4	246	7.52	1.37			245.9	1.98	1.91	500.6	139	97.1	5.46	0.86	13.63	23.1	13.63
0	0	1168.8	4	55	1	18.7	16	2	3	0	0	156	2	1	5	4.87	1	0.22	240	6.2	117	4.87	0.22	240	1104	35.44	323	8.58	94	69.5	40.5	403	6.15	2.78			916.6	2.2	1.68	544.9	140.3	98.5	5.34	1.11	2.25	22.2	2.25
0	2	686	2	57	0	19.9	9	2	1	1	0	19	1	3	5	4.9	1.1	0.27	154	6.54	130	4.45455	0.245455	140	765	22.37	337	15.64	86	68.9	38.8	273	4.7	2.06			1228	2.65	1.51	77.8	133.7	96.9	4.98	1.06	2.8	21.6	2.8
0	3	555.885	2	78	0	19	12	2	1	1	1	6	1	0	5	2.67	0.61	0.28	127	3.74	105	4.37705	0.459016	208.197	932	39.28	604	12.32	75	64.5	37.2	308	4.23	2.1			330.3	2.03	2.74	416.8	145.4	102.7	5.77	1.29	2.02	23.2	2.02
0	2	1219.5	4	66	0	22.9	9	2	3	0	0	22	1	0	5	5.42	1.04	0.28	234	6.9	101	5.21154	0.269231	225	521	25.6	362	23.62	83	76.9	38.1	274	3.42	4.13			778.6	2.09	1.68	372.2	132.1	98.9	4.68	1.03	10.36	20.9	10.36
0	2	430.08	1	57	0	23.4	15	2	3	1	0	39	1	2	5	4.48	1.5	0.34	144	6.49	117	2.98667	0.226667	96	1205	30.16	225	7.42	66	72.7	42.1	345	3	2.31			1328.3	2.37	1.64	195.5	141.3	99.8	5.38	1.47	0.55	23.7	0.55
0	1	949	3	36	1	19.7	9	2	3	0	0	30	1	1	5	5.84	1.6	0.52	260	8.23	121	3.65	0.325	162.5	907	29.36	457	21.41	119	68.3	38.5	269	4.01	2.79			997.9	1.8	2.7	447.8	129	91.5	4.79	1.02	1.76	18.3	1.76
0	0	458.702	1	72	0	17.8	12	4	3	1	0	60	3	0	5	3.29	1.04	0.37	145	8.32	93	3.16346	0.355769	139.423	737	30.89	349	7.87	126	76.8	37.8	148	2.68	0.55			717.8	2.17	1.59	252.1	134.7	100.4	4.61	0.93	7.12	16.7	7.12
0	0	424.87	1	74	0	24.9	15	4	3	0	0	6	2	0	5	3.49	1.38	0.52	168	5.46	103	2.52899	0.376812	121.739	751	28.1	516	6.24	37	56.3	31	213	4.6	0.73			787.5	2.08	1.82	335.9	143	109.2	4.43	0.99	7.9	19	7.9
0	3	646.043	2	53	1	21.3	15	2	3	0	0	3	1	8	11	3.81	1.15	0.38	195	5.55	99	3.31304	0.330435	169.565	392	11.83	235	14.29	114	66.8	42.4	223	3.83	0.87			822.3	2.22	1.28	243.2	140.6	104.4	4.69	0.88	0.87	23.5	0.87
0	0	933.923	3	52	0	22.1	12	2	2	1	0	6	1	0	5	5.13	0.78	0.3	142	6.53	110	6.57692	0.384615	182.051	585	24.88	380	16.67	76	64.3	35	249	4.31	1.69			512.4	2.09	2.01	874.8	129.7	95.6	5.56	0.98	13.29	20.8	13.29
0	0	554.127	2	72	1	25	15	2	3	0	0	6	2	0	5	3.04	0.79	0.19	144	4.16	117	3.8481	0.240506	182.278	994	26.63	465	10.23	37	60.7	34.4	206	2.82	0.67			358.7	2.11	1.15	195.9	140.4	102	4.68	1.05	0.26	25.4	0.26
0	0	647.68	2	54	1	22.3	12	2	2	0	0	24	4	0	5	5.52	1.5	0.43	176	8.27	113	3.68	0.286667	117.333	1075	32.25	490	7.61	56	61.6	36.4	354	3.97	2.54			908	2.01	2.03	99.8	139.5	104.1	4.32	0.96	4.34	19.9	4.34
0	5	523.731	2	68	0	24	15	3	3	1	0	10	2	4	5	5.34	1.04	0.42	102	6.96	126	5.13462	0.403846	98.0769	751	28.1	516	6.24	37	56.3	31	213	4.6	0.73			734.5	2.08	1.82	383.1	143	109.2	4.43	0.99	7.9	19	7.9
0	0	555.949	2	81	1	27.7	9	4	3	0	0	15	1	1	5	4.88	0.79	0.32	90	6.15	102	6.17722	0.405063	113.924	987	38.46	472	12.56	56	61.6	38.5	244	4.36	1.57			1203.8	2.27	2.16	231.4	138.1	101.2	5.4	1.15	2.49	20.4	2.49
0	1	729.857	3	45	1	22.6	9	2	3	0	0	3	1	6	5	3.93	0.91	0.43	169	5.46	78	4.31868	0.472527	185.714	398	22.76	440	4.4	138	54.2	30.2	209	2.87	0.94			172.4	1.92	1.38	288.5	139.3	106.7	6.2	0.83	45.26	20.3	45.26
0	5	582.712	2	81	1	16	9	2	3	0	0	49	2	1	5	3.79	0.8	0.39	123	5.28	101	4.7375	0.4875	153.75	781	25.19	390	7.81	82	66.6	35.7	220	4.27	2.15			1304	2.46	1.45	337.3	141.3	104.3	5.05	0.83	2.14	21.6	2.14
0	2	763.117	3	51	0	14	12	2	3	0	1	25	1	3	5	4.52	0.77	0.22	130	5.6	121	5.87013	0.285714	168.831	1194	50.14	458	13.39	51	67.3	45.7	413	3.62	2.5			1402	2.02	2.2	178	136.7	95.7	5	0.88	0.18	18.7	0.18
0	2	506.225	2	53	1	25.4	16	1	2	0	0	36	1	0	5	3.64	1.51	0.25	210	5.62	99	2.4106	0.165563	139.073	681	24.59	467	20.85	123	70.8	43.4	300	3.64	3.4			1300	2.38	2.04	150	125.1	90.9	4.34	0.99	25.62	16.7	25.62
0	0	557.879	2	36	1	16.2	16	2	1	0	0	3	2	0	5	5.26	1.65	0.35	175	7.42	92	3.18788	0.212121	106.061	871	12.93	205	5.66	53	64.2	35.9	208	5.57	1.45			1110.4	2.09	2.27	922.8	138.3	99.6	4.48	0.88	3.54	19.5	3.54
0	2	621.81	2	27	1	17	14	1	1	0	0	3	6	3	19	3.72	1.37	0.23	229	5.51	83	2.71533	0.167883	167.153	517	12.44	129	4.72	323	66.5	39.1	338	3.86	1.83			163.4	1.88	0.99	1731.7	142	103.2	3.49	1.03	1.4	25.8	1.4
0	0	1745.44	4	49	1	15.7	18	2	3	0	0	10	1	0	6	6.83	0.63	0.82	161	8.59	117	10.8413	1.30159	255.556	755	34.76	553	10.42	102	69.5	40.9	277	5.19	1.46			1506.8	2.09	2.54	404.5	139.3	96.1	6	0.88	0.5	19.7	0.5
0	0	1696.5	4	69	0	25.8	14	2	3	0	0	36	2	0	5	7.83	0.9	0.5	195	11	110	8.7	0.555556	216.667	854	32.22	586	5.36	51	67.9	36.1	314	3.82	0.62			1475.2	2.28	2.46	269.7	141.2	98.1	4.8	1.14	8.61	23.9	8.61
0	5	371.266	1	44	0	22.7	12	2	1	0	0	3	1	1	5	3.02	1.09	0.34	134	4.86	116	2.77064	0.311927	122.936	399	30.73	325	4.52	81	67.4	36	173	3.9	1.19			81.6	2.2	1.61	442.6	141.4	106.2	5.18	1.04	10.43	21.9	10.43
0	0	261.374	1	64	0	21.2	13	2	2	0	0	100	1	19	5	3.35	0.91	0.34	71	4.87	123	3.68132	0.373626	78.022	768	26.79	379	10.61	119	63.1	29.8	124	2.58	0.78			263.7	2.44	1.25	24.3	137.6	103.5	4.61	0.81	1.59	22.7	1.59
0	4	711	3	44	1	15.2	15	1	1	0	0	384	6	7	26	3.6	0.8	0.3	158	5.1	106	4.5	0.375	197.5	1069.3	33.65	622.5	6.79	47.5		43.5	480.1	5.29	1.45			1500	2.62	2.36	47.7	140.2	93.5	4.49	1.64		25.9
0	6	705.833	3	78	1	24.2	9	4	3	0	0	4	1	11	5	3.5	1.2	0.3	242	5.3	116	2.91667	0.25	201.667	312	34.72	516.3	23.04	111.4		37.3	222.9	3.1	1.6			120.19	2.08	1.47	126.85	133.1	101	4.36	1.47		20.6
0	0	666.818	2	44	0	18.3	15	2	3	1	0	24	6	1	15	4.5	1.1	0.4	163	6.2	125	4.09091	0.363636	148.182	1149.1	44.73	522.5	7.55	352.2		40.4	326.8	4.67	1.81			264.63	2.21	2.52	2071.6	134	92.5	4.16	1.15		19.9
0	7	261.8	1	67	0	20.8	9	2	3	0	0	3	1	2	11	1.7	0.5	0.3	77	2.24	76	3.4	0.6	154	285.2	16.2	343.2	7.56	103.9		26	124.6	3.59	0.67			286.85	2.05	1.69	367.18	138.6	105.7	4.64	0.88		23.8
0	1	594	2	74	0	22.6	9	2	3	0	0	36	1	3	5	5.4	1.5	0.4	165	7.6	121	3.6	0.266667	110	856.6	24.93	447.9	11.91	152.7		38	379.7	2.76	1.83			331.8	2.26	1.99	688.68	141.5	104.9	4.33	1.11		19.7
0	1	643.2	2	69	1	22.2	9	2	2	0	0	60	6	2	8	4.8	1.5	0.8	201	7.3	141	3.2	0.533333	134	663.7	31.31	486.1	8.44	53.1		39.8	355.8	3.35	1.8			239.13	2.12	2.54	191.71	130.6	86.7	7.02	1.26		24.1
0	0	961.364	3	76	1	19.5	9	2	3	0	0	4	1	0	22	4.7	1.1	0.3	225	6.6	118	4.27273	0.272727	204.545	664	26.56	360.2	6.82	83.2		34.2	222.3	3.03	1.03			243.79	2.31	1.48	260.71	136.9	100.1	5.78	1.18		24.4
0	5	274	1	57	1	19.4	12	2	3	0	0	24	1	9	5	2.4	1.2	0.4	137	4.3	95	2	0.333333	114.167	623.8	20.32	410.9	8.47	182.5		32.4	114.5	2.93	0.98			16.7	1.91	1.83	571.75	140.3	104.1	4.91	0.97		21.3
0	0	358.312	1	79	1	16.8	15	2	3	0	0	23	1	0	5	3.9	1.6	0.5	147	6.2	119	2.4375	0.3125	91.875	863.3	47.32	448.5	8.91	219.2		35.8	363.6	3.35	1.25			468.51	2.22	1.61	411.46	136.1	98.5	5.19	0.93		17.8
0	0	1533.6	4	39	1	19.6	15	2	1	0	0	30	1	2	11	8.1	1.5	0.6	284	11	118	5.4	0.4	189.333	701.6	32.32	521.6	9.93	106.2		42.8	309	5.96	2.01			896.66	1.91	1.83	438.75	139.9	102.3	5.44	1.21		20.8
0	6	1180.26	4	44	1	20.9	15	2	1	0	0	120	1	2	8	6.9	1.9	0.6	325	9.5	115	3.63158	0.315789	171.053	1152.9	32.18	474.6	5.03	221.2		41.9	444.3	4.23	2.26			160.85	2.7	1.16	366.78	135.1	98.9	4.69	1.44		21.8
0	4	932.571	3	45	1	28.1	12	2	3	0	0	60	1	0	5	4.8	1.4	0.6	272	6.9	116	3.42857	0.428571	194.286	770.4	30.5	356.4	5.81	77.2		40.8	175.6	3.47	3.11			274.69	2.84	2.41	128.3	136.5	100.6	5.91	1.38		20.1
0	4	845.625	3	58	0	19.9	9	2	1	1	0	216	4	3	11	3.3	0.8	0.4	205	4.7	126	4.125	0.5	256.25	1296.9	27.17	521.6	5.09	55.9		41.6	299.2	3.91	1.07			390.67	2.73	2.19	185.95	138	98.3	5.39	1.17		24.1
0	2	488.571	2	63	1	16.7	12	4	2	0	0	86	2	0	5	3.6	1.4	0.5	190	5.9	120	2.57143	0.357143	135.714	1028.1	46.79	474.6	5.82	74.4		39.9	252.7	5.15	1.03			456.53	2.74	1.92	485.42	134.3	94.4	5.41	1.4		20.9
0	1	1343.89	4	51	1	34.6	15	2	2	0	0	60	6	0	5	5.9	0.9	0.6	205	7.6	99	6.55556	0.666667	227.778	1003.8	27.1	448.2	6.22	151.6		39.3	434.1	4.68	6.63			223.49	2.52	2.51	417.8	134.5	96.4	5.93	1.42		22.9
0	2	520.333	2	51	0	23.1	18	2	3	0	0	30	3	3	14	3.5	1.5	0.6	223	6.1	90	2.33333	0.4	148.667	1313.9	32.88	157.1	5.34	52.6		42.4	323.8	4.72	2.03			385	2.22	2.24	625.16	139.4	102.8	5.71	0.92		22.8
0	7	908.308	3	48	0	25.5	9	2	3	0	1	36	2	2	5	4.8	1.3	0.5	246	7.1	116	3.69231	0.384615	189.231	1487.8	35.44	592.1	5.82	110.8		43.8	461.9	2.48	0.86			422.37	2.33	1.94	951.29	135.6	98.7	6.03	1.12		18.1
0	4	1617	4	67	1	21.3	9	2	2	0	0	36	1	0	5	4.9	0.6	0.4	198	6	117	8.16667	0.666667	330	616	34.29	435	24.32	124.2		40.6	321	2.99	1.77			98.9	2.32	1.86	111.16	130.8	96.6	6.79	1.52		19.9
0	6	659.154	2	68	0	24.5	12	2	3	0	1	120	1	0	7	4.1	1.3	0.6	209	6.3	107	3.15385	0.461538	160.769	852	20.06	413.3	4.48	117.4		36.8	250	3.55	2.46			409.55	2.39	1.55	452.68	134.3	98.6	5.23	0.9		22.1
0	1	324.3	1	53	1	20.5	12	2	1	0	0	240	3	2	5	2.3	1	0.3	141	3.8	113	2.3	0.3	141	1080.6	23.97	339.2	7.89	127.7		36.8	338.7	4.62	0.86			495.03	2.34	0.98	214.7	139.9	100.7	4.86	1.19		22.4
0	2	322	1	53	0	25.5	10	2	3	1	0	18	3	0	5	2.3	0.9	0.3	126	3.6	108	2.55556	0.333333	140	1345.2	31.5	515.2	6.22	82.9		39.6	351.8	3.13	1.53			105.23	2.49	1.6	379.38	138.3	100.8	5.57	1.31		20
0	0	596.667	2	74	1	22	9	2	3	0	0	36	1	0	5	4	1.2	0.6	179	6	102	3.33333	0.5	149.167	978	39.15	486	20.77	123.7		38.5	430.9	4.52	4.29			377.88	1.93	2.12	434.53	131.8	94.3	5.55	1.05		18.3
0	0	1147.5	4	69	1	23	5	4	3	0	0	5	6	0	5	5.4	0.8	0.5	170	6.9	100	6.75	0.625	212.5	552.1	25.32	418.8	5.89	177.7		35.2	192.3	2.9	1.2			75.33	2.17	1.85	277.9	133.4	101.5	4.42	1.06		15.8
0	0	1584.44	4	64	0	26.6	12	2	3	1	0	72	1	1	5	6.2	0.9	0.6	230	8.1	113	6.88889	0.666667	255.556	826.9	28.08	442.9	13.93	69.9		38.1	273.8	2.67	2.04			337.2	2.81	1.41	197.04	137.8	99.8	6.65	1.38		23.8
0	3	794.667	3	58	0	21.5	9	2	2	0	1	72	2	0	5	3.2	0.6	0.4	149	4.5	85	5.33333	0.666667	248.333	1132.2	24.34	512.5	5.02	69.5		38.6	222.7	3.94	1.91			247.18	2.25	2.55	584.2	135.8	97.5	4.85	1.03		21.4
0	1	614.4	2	55	0	21.5	12	2	3	0	0	5	2	1	5	3.2	1	0.4	192	4.7	118	3.2	0.4	192	1492.6	52.46	695	8.36	45.1		38.7	380.2	2.79	0.67			246.61	2.57	3.56	145.47	138.6	96.7	5.96	1.4		19.5
0	0	576.667	2	65	0	22.7	9	2	3	0	1	40	2	1	20	4	1.2	0.4	173	5.8	124	3.33333	0.333333	144.167	1172.4	35.89	372.5	4.79	124.5		40.8	442.4	3.88	1.34			54.96	2.48	2.06	267.52	135.8	97.3	4.85	1.34		15
0	1	785.727	3	69	0	22.5	12	2	3	1	0	36	2	0	16	4.3	1.1	0.5	201	6.3	117	3.90909	0.454545	182.727	1332.7	35.36	467.6	6.83	108.9		41.8	401	5.18	2.83			480.47	2.35	1.62	369.66	138	98.5	5.21	1.16		26.8
0	7	938	3	27	0	26.8	12	1	2	0	0	8	3	1	5	6.7	1.4	0.5	196	9	64	4.78571	0.357143	140	943.8	17.23	370.4	13.23	77.6		36.5		4.17	1.01			24.09	2.17	2.01	246	136.4	97.99	4.02	0.78		28.1
0	0	550.8	2	63	0	24.4	12	4	2	0	1	72	1	0	5	3.6	1	0.5	153	5.5	139	3.6	0.5	153	1344.5	39.68	644.9	7.33	139.1		42.1	461.4	4.86	4.12			214.86	1.88	3.01	601.33	138.7	98.9	6.53	1.32		16.8
0	7	510.267	2	75	0	24	15	2	3	0	0	35	1	8	5	4.3	1.5	0.5	178	6.6	89	2.86667	0.333333	118.667	905.1	19.15	346.6	10.31	97.1		40.4	266.7	3.78	0.96			278.32	2.52	0.77	125.23	133.6	95	4.08	0.99		24
0	0	597.068	2	77	1	26.1	12	2	3	0	0	3	1	1	18	9.73	1.76	0.44	108	11.98	94	5.52841	0.25	61.3636	316.1	13.09	179.2	18.06			24.7	18.2	5.45	1.65				2.04	1.15	22.3	134	97.74	4.08	0.81		26.7
0	0	972.133	4	76	1	23.2	15	4	3	0	0	144	3	0	5	4.6	1.5	0.4	317	6.7	101	3.06667	0.266667	211.333	578.4	19.18	335.9	8.07	75.4		32.4	17.3	3.75	1.41			208.39	2.05	2.62		132.9	94.87	4.81	0.96		26.4
0	3	459.692	1	42	1	18.1	16	1	3	0	0	8	6	8	16	3.6	1.3	0.4	166	5.4	111	2.76923	0.307692	127.692	993.3	37.45	384.1	6.55	74.5		38.9	340	4.86	0.63			687.76	2.3	2.75	386.79	127.9	89.3	4.43	1.05		20.1
0	0	468	1	40	0	26.8	15	2	3	0	0	11	2	4	5	3.9	1.5	0.3	180	5.8	105	2.6	0.2	120	781.2	32.67	515.2	6.81	64.5		40.9	414.5	3.07	1.8			326.78	2.07	2.49	534.59	138	101.1	4.83	1.17		20.7
0	0	306.6	1	57	0	21.1	9	2	2	1	0	60	1	0	5	2.1	1.5	0.3	219	4.1	118	1.4	0.2	146	997.5	29.74	499.2	12.01	106.5		41.4	290.1	2.85	1.05			235.51	2.12	1.6	251.91	138.9	99.6	5.37	1.51		25.4
0	4	262	1	65	1	19.3	15	4	3	0	0	156	6	4	21	2	1	0.7	131	3.7	109	2	0.7	131	985.6	21.69	393.4	4.79	62.3		38	272.8	4.2	0.85			634.07	2.4	1.38	83.79	135.5	98.9	4.97	1.17		23.2
0	1	447	1	65	0	23.3	12	2	3	0	1	12	6	4	5	2.7	0.9	0.5	149	4.2	112	3	0.555556	165.556	1208.7	28.24	540.6	9.66	83.6		36	275.7	4.02	0.83			180.64	2.11	1.43	328.57	139	103.5	5.08	1.26		22.5
0	0	317.381	1	84	0	22.8	14	2	3	0	0	14	6	0	5	3.1	2.1	0.7	215	6.2	93	1.47619	0.333333	102.381	645	21.17	276.4	4.61	108.4		38.2	12.9	3.24	0.81			32.4	2.04	2.06		133.5	101.21	4.79	1.06		24.4
0	5	730.444	3	60	0	21.8	12	2	3	0	0	37	1	1	5	3.8	0.9	0.5	173	5.4	122	4.22222	0.555556	192.222	1321.4	42.95	526.1	5.29	64.3		35.4	256.5	2.77	0.55			429.4	2.34	2.57	102.14	140.3	100.8	5.16	1.29		19
0	4	657.818	2	72	0	27.7	9	2	3	0	0	24	1	6	5	3.6	1.1	0.6	201	6	111	3.27273	0.545455	182.727	989.1	31.9	491.7	24.9	180.9		34.7	193.3	2.69	2.44			440.3	2.2	1.6	116.18	129.9	92.9	6.83	1.11		26.4
0	3	555.219	2	41	0	29.6	16	2	3	0	1	15	1	3	8	4.12	2.1	0.52	283	7.08	108	1.96191	0.247619	134.762	1165.4	24.8	505.4	16.26	118.7		38.3	380.4	2.33	2.16			404.87	2.36	2.38	386.96	134.7	95.8	5.36	1.1		21.2
0	2	409.142	1	34	0	21	15	2	1	1	0	11	6	2	5	4.01	1.97	0.25	201	6.35	127	2.03553	0.126904	102.03	1155	20.8	358	5.1	65.5		40	296	3.41	1.04			200.3	2.32	2.22	336.2	139.7	101.1	4.98	1.03		25.5	5.71
0	0	264.286	1	45	0	24.8	8	2	3	0	0	36	1	0	5	2.96	1.96	0.43	175	5.55	125	1.5102	0.219388	89.2857	1180	27.3	404	14.8	103.9		41	338	4.16	1.44			264.7	2.48	1.96	108.4	139.9	98.5	4.77	1.14		23.7	1.54
0	3	544.582	2	77	0	24.2	9	2	3	0	0	84	1	0	5	4.39	0.79	0.62	98	5.95	124	5.55696	0.78481	124.051	562	22.4	300	13.4	75		40.3	324	3.2	2.25			299.1	2.12	2.09	214.4	138.1	101.2	5.96	1.07		21.8	0.97
0	6	415.075	1	61	1	29	12	2	1	0	0	35	2	2	5	3.05	1.33	0.31	181	4.76	112	2.29323	0.233083	136.09	799	19.9	323	9.2	114.9		40	370	3.94	2.76			437.2	2.1	1.18	124.5	137.2	102.5	4.81	1.28		23.2	0.86
0	0	1061.48	4	70	0	22.5	9	2	1	0	0	84	6	2	5	3.9	1.15	0.48	313	5.63	123	3.3913	0.417391	272.174	926	17.8	378	6	51.7		40.3	258	3.57	1.97			137.4	2.21	1.14	162.8	135.1	99.7	6.17	1.08		24.2	1.65
0	0	364.441	1	52	0	30.6	9	2	3	1	1	24	2	0	5	3.83	2.27	0.28	216	6.65	116	1.68722	0.123348	95.1542	743	21.9	448	8.1	88.9		44.7	516	3.98	2.81			209.4	2.36	1.32	359	139.2	103.9	3.97	1.04		22.2	0.58
0	5	490.286	2	53	0	27.5	15	2	1	0	0	60	2	3	14	5.72	1.19	0.5	102	7.53	127	4.80672	0.420168	85.7143	952	21.8	515	7.6	73.9		40.7	215	2.92	3.48			135.2	2.34	1.5	469.9	139.2	99.8	3.82	0.96		22.7	5.96
0	5	828.721	3	53	1	24.7	9	2	3	0	0	37	1	5	5	5.34	1.83	0.41	284	7.69	131	2.91803	0.224044	155.191	537	17.1	302	9.8	101.6		42.3	318	4.31	1.58			115.6	2.41	1.26	206	137.6	100.1	4.87	0.99		23.5	0.91
0	6	844.742	3	68	0	20.1	9	2	3	0	0	36	6	0	5	4.82	0.97	0.39	170	6.44	108	4.96907	0.402062	175.258	912	20.9	318	7.7	62.5		38.5	326	3.08	3.34			195.8	2.22	1.55	142.7	134.1	96.8	4.82	0.85		24.8	1.34
0	3	861.882	3	56	0	28.4	8	2	1	0	0	165	2	1	5	6.66	1.36	0.65	176	8.86	127	4.89706	0.477941	129.412	1010	22.8	448	7.6	62.9		44	410	3.23	2.21			320.1	2.17	1.83	2.4	141.4	104.6	5.45	1.08		20.4	5.44
0	3	350.119	1	61	1	23.8	12	2	1	0	0	228	6	4	5	2.73	1.77	0.4	227	5.67	115	1.54237	0.225989	128.249	835	24.9	343	6.2	50.4		46	347	5.28	1.81			595.5	2.1	1.35	0.1	139.3	96	5.59	1.17		26.1	0.49
0	3	399.992	1	58	0	23.1	12	2	3	0	0	10	6	0	5	2.87	1.27	0.34	177	5.02	124	2.25984	0.267717	139.37	882	31.2	303	6.6	86.7		38.9	334	3.25	1.44			126.8	2.42	1.74	351.2	140.1	103.4	5	1.25		21.8	2.06
0	4	627.248	2	58	0	27.2	9	4	3	0	0	7	1	0	5	4.27	1.45	0.49	213	6.32	124	2.94483	0.337931	146.897	1058	22.3	402	5.9	64.3		42.3	360	2.33	1.05			546.6	2.3	1.84	245.4	135.2	98.7	5.74	1.35		20.5	0.2
0	1	333.517	1	48	0	25.4	16	1	3	0	0	156	6	0	5	3.72	1.16	0.57	104	5.81	126	3.2069	0.491379	89.6552	1072	33.6	506	4.7	92.4		45.2	338	3.79	2.39			258.2	2.5	1.35	750.3	142.4	98.8	4.85	1.33		23.5	2.89
0	2	390	1	48	0	22.1	16	2	1	0	1	59	1	0	9	3.12	1.08	0.33	135	4.82	113	2.88889	0.305556	125	909	24.6	400	7	79.3		45	395	2.3	1			234.9	2.33	1.5	196.6	136.8	101.2	4.79	1.17		21	0.36
0	4	719.4	3	34	0	21.7	15	2	2	0	0	120	6	3	5	3.63	1.1	0.35	218	5.22	105	3.3	0.318182	198.182	1334	25.9	425	5.7	92.4		43.2	445	3.14	2.34			329.4	2.24	1.62	333.9	138.6	100.3	5.59	1.21		24.4	2.94
0	1	437.848	1	40	0	21.4	16	3	3	0	1	60	4	4	5	5.08	2.1	0.47	181	8.32	121	2.41905	0.22381	86.1905	1225	21.5	343	7.4	65.5		43	366	3.55	1.77			326.9	2.21	1.14	312.3	139.1	100.8	4.29	1.03		23.9	0.49
0	0	466.568	1	60	0	24.1	12	2	1	0	0	24	6	0	5	2.83	0.74	0.48	122	4.2	120	3.82432	0.648649	164.865	922	31.3	418	10.6	99.9		41.7	302	3.03	3.97			400.4	2.25	1.09	104.4	134.2	95.5	3.9	1.21		24.2	11.79
0	3	524.246	2	53	0	27.7	12	2	2	1	1	12	2	1	5	2.23	0.57	0.24	134	3.21	126	3.91228	0.421053	235.088	1231	28.1	420	4.4	77.8		42.7	437	4.42	1.07			200.8	2.09	2.51	224.6	142.2	104.5	5.43	1.2		19.2	2.85
0	4	1375.81	4	43	0	22.2	15	2	3	0	0	25	2	0	16	6.39	0.98	0.42	211	7.83	77	6.52041	0.428571	215.306	1140	24.4	428	8.3	102.2		43.8	533	4.3	2.25			281.9	2.01	2.08	442.9	138.7	100.2	5.96	0.98		19.9	0.72
0	5	739.14	3	68	0	25.1	5	2	3	1	1	36	6	0	5	5.82	1	0.64	127	7.94	123	5.82	0.64	127	978	32	457	6.2	93.1		44.6	318	3.06	0.63			440.2	2.33	1.65	263.6	138.5	99.8	5.31	1.13		23.2	4.37
0	7	666.111	2	72	1	22.2	9	2	1	0	0	156	2	2	5	5.45	1.08	0.43	132	7.02	122	5.0463	0.398148	122.222	762	29.3	308	6.5	102.7		37.4	230	3.32	1.37			204.2	2.11	1.02	12.9	136	99.2	5.14	0.94		20.5	24.89
0	3	741.961	3	35	0	22.6	12	1	1	0	0	120	2	0	11	4.3	1.53	0.38	264	7.01	141	2.81046	0.248366	172.549	1248	29.1	429	6	130.1		46.3	373	4.82	1.98			257.3	2.22	1.98	242.8	137.2	97.8	5.46	1.33		18.2	1.09
0	5	843.945	3	71	0	20.8	4	2	3	1	0	60	2	0	5	6.04	1.46	0.58	204	8.25	115	4.13699	0.39726	139.726	881	41.6	327	7.9	95.6		40	280	4.27	1.43			422.9	2.23	1.16	90.2	139.8	98	5.13	1.15		22.6	3.69
0	3	300.887	1	48	0	27	12	2	1	1	0	24	2	0	5	3.73	1.5	0.38	121	5.75	127	2.48667	0.253333	80.6667	1052	28.5	442	4.8	65.5		46.2	370	3.24	2.49			317.8	2.24	1.98	226.1	139.3	98.8	5.48	1.22		23.5	0.86
0	6	256.833	1	52	0	28.7	8	2	1	0	0	90	2	1	5	3.68	0.96	0.3	67	5.6	152	3.83333	0.3125	69.7917	1210	30.7	439	8	83		43.7	288	2.54	0.99			43.3	2.16	2.48	255.8	138	103	5.43	1.39		16.3	0.2
0	4	1193.61	4	64	0	22.6	9	2	2	0	0	13	1	0	5	5.52	1.54	0.44	333	7.95	118	3.58442	0.285714	216.234	725	14	312	9	106.4		41.4	229	2.66	0.59			212.2	2.19	0.8	133.6	136.2	99	5.37	1.13		25.4	0.27
0	4	423	1	57	1	28.3	12	2	2	1	0	67	4	2	5	2.82	1.3	0.49	195	4.73	106	2.16923	0.376923	150	917	23.4	410	7.7	75.3		38.6	369	3.95	2.78			343.1	2.13	1.51	255.2	137.1	99.6	5.26	1		24.9	0.46
0	3	332.066	1	71	0	23.4	5	2	1	0	0	84	6	1	5	2.87	1.21	0.32	140	4.51	135	2.3719	0.264463	115.702	1010	35.9	485	11.8	51.9		40.6	279	3.88	0.87			95.8	2.1	2.24	267.4	135.9	95.3	5.1	1.03		21.2	2.32
0	3	801.613	3	60	1	24.4	9	2	1	0	0	120	2	1	5	4.97	1.24	0.35	200	6.68	125	4.00807	0.282258	161.29	846	23.3	436	6.3	63.4		42.4	400	3.38	6.34			297.9	2.2	2.1	268.3	140	102	5.28	1.32		22.1	1.37
0	4	1120.62	4	69	0	23.8	12	2	3	0	0	132	1	0	5	5.05	1.05	0.26	233	6.58	125	4.80952	0.247619	221.905	1143	35.1	480	9.6	71.5		44.7	394	4.15	1.74			118.3	2.37	1.79	263.6	136.8	100	5.9	1.18		17.5	0.97
0	0	930.562	3	36	1	33	15	2	3	0	0	60	4	0	5	6.47	1.62	0.37	233	9	99	3.99383	0.228395	143.827	1064	22.6	685	17.6	92.2		41	285	4.89	4.26			26.2	2.3	2.53	367.6	129.9	87.4	4.8	1.05		23.5	27.87
0	0	493.5	2	66	0	21.1	5	2	1	0	0	110	1	2	5	3.78	1.08	0.33	141	6	115	3.5	0.305556	130.556	1086	25.3	429	8.4	119.9		44.8	312	3.09	0.96			122	2.57	1.46	544.8	138.4	102.2	4.67	1.46		22.8	1.31
0	0	630.922	2	62	1	22.7	9	2	2	0	0	204	1	0	5	3.74	1.15	0.3	194	5.23	116	3.25217	0.26087	168.696	818	22	321	6	145.2		40.1	325	4.03	0.88			348	2.37	1.19	78.1	140.8	101.2	5.85	1.17		29.7	0.62
0	0	981.438	4	44	0	23.9	9	2	3	1	0	36	2	0	5	3.83	1.12	0.28	287	5.38	123	3.41964	0.25	256.25	921	14.1	425	7	102.1		47.4	479	4.18	1.71			309.2	2.27	0.97	371.5	137.8	101.5	4.62	1.23		22.4	1.43
0	1	644.953	2	73	1	20.3	3	2	1	0	0	180	2	0	5	4.79	1.27	0.45	171	6.62	118	3.77165	0.354331	134.646	704	20	422	5.7	108.1		39.2	306	5.73	1.57			432.8	2.31	2.23	137.6	138.4	100.4	6.82	1.22		22.9	3.33
0	4	289.267	1	39	0	18.8	12	2	3	0	1	144	2	0	5	2.69	1.46	0.31	157	4.63	123	1.84247	0.212329	107.534	1114	19.9	345	6.9	126		43.9	469	4.53	1.42			143.9	2.35	1.54	240.9	140.6	100.8	4.6	1.16		23.7	0.28
0	0	925.2	3	42	0	25.5	15	2	1	1	0	36	2	0	16	5.94	1.65	0.56	257	8.25	111	3.6	0.339394	155.758	1161	24.3	463	5.4	70.6		40.2	332	3.49	1.88			255.8	2.2	1.42	253.8	137	95.1	4.76	1.09		28.8	18.35
0	4	423.485	1	35	0	22.5	16	2	3	0	0	24	3	1	5	4.3	1.32	0.48	130	6.27	110	3.25758	0.363636	98.4848	1228	21.2	423	4.4	73.3		43.7	389	2.05	1.26			471.8	2.36	1.69	225.2	140.4	101.6	5.76	1.18		23.4	0.4
0	0	1541.69	4	72	0	28.4	9	2	3	0	1	38	2	0	5	7.23	1.36	0.79	290	9.49	122	5.31618	0.580882	213.235	938	22.8	336	7.5	79.5		39.5	303	2.48	2.06			214.6	2.21	2.19	168.3	135.8	96	4.76	1.06		24.4	5.3
0	2	1015.75	4	47	1	29.1	9	2	1	1	0	119	2	2	5	5.61	1.32	0.36	239	8.09	128	4.25	0.272727	181.061	964	18	405	7.4	78.3		41.5	365	3.65	1.5			337.2	2.52	1.76	107.8	138.7	97.3	4.32	1.16		27.6	1.64
0	0	1251.11	4	60	0	25.1	5	2	2	0	0	114	2	3	5	4.66	0.92	0.55	247	6.55	120	5.06522	0.597826	268.478	1005	25.4	325	6.2	138.5		42.7	310	4.34	1.85			427.9	2.32	1.56	164.4	138.2	101.4	4.3	1.04		19	27.45
0	0	753.284	3	50	0	28.2	15	2	3	1	0	8	1	3	11	4.9	2.01	0.36	309	7.84	111	2.43781	0.179104	153.731	690	19.5	322	12.2	57.7		42	202	2.59	1.04			219.9	2.3	1.45	241.7	136	104.7	4.83	1		18.2	1.68
1	11	1182.5	4	53	0	22.7	12	2	2	0	0	240	2	1	11	4.73	1.04	0.64	260	6.55	107	4.54808	0.615385	250	1142	32.89	128	4.85	63	70.3	37.1	208	3.41	1.4	2.2	0.81	84.7	1.97	2.51	709.1	139.4	99.5	5.47	0.95	80.64	21.1	80.64
1	20	1396.04	4	72	1	16.8	9	4	2	0	0	60	5	8	5	4.62	0.46	0.38	139	5.54	115	10.0435	0.826087	302.174	669	33.66	347	6.71	161	73.6	37.8	187	3.44	1.36	2	1.03	1190.6	2.31	2.18	264.8	135.7	94.9	5.91	0.81	7.76	21.6	7.76
1	10	1165.71	4	68	0	21.5	5	2	2	1	0	28	1	3	5	4.8	0.63	0.38	153	5.96	127	7.61905	0.603175	242.857	509	20.24	354	15.6	98	73.7	34.6	173	2.58	0.77	1.13	1.16	665.8	2.22	1.42	234.6	142	104.2	4.39	0.97	13.37	26.3	13.37
1	16	450.848	1	49	0	24.6	5	2	1	0	1	6	1	3	5	3.46	0.99	0.38	129	5.02	73	3.49495	0.383838	130.303	1165	30.23	425	6.65	99	60	34.4	308	2.62	0.31	1.39	1.16	646.2	1.84	2.38	481.8	143.2	108.3	4.86	0.85	0.65	20.7	0.65
1	19	2470.4	4	59	0	22.8	12	2	1	0	0	3	1	7	5	7.72	0.4	0.45	128	8.75	129	19.3	1.125	320	1012	27.33	398	11.25	53	66.6	40.2	303	4.39	1.63	2.73	1.05	1024.9	2.15	2.61	292.4	139.3	102.9	5.49	0.87	2.02	20.2	2.02
1	9	1188.85	4	66	0	23.5	9	4	1	0	0	4	1	0	7	3.91	0.74	0.25	225	5	108	5.28378	0.337838	304.054	745	23.96	324	13.85	43	67.4	37.5	326	2.3	1.48	1.31	0.64	43.3	2.2	1.26	579.2	143.3	107.6	4.35	0.97	0.54	21.9	0.54
1	21	1408	4	60	1	29	9	2	1	0	0	30	1	19	5	6.16	0.91	0.4	208	7.77	102	6.76923	0.43956	228.571	565	31.9	482	9.48	92	70	39.4	287	3.15	1.2	1.54	1.26	1410	1.97	2.3	510	138.5	104.5	3.95	0.83	0.93	18.2	0.93
1	16	1231.09	4	68	0	18.8	5	3	1	0	0	24	2	3	10	3.05	0.55	0.37	222	4.1	90	5.54545	0.672727	403.636	1214	25.57	469	7.17	58	62.9	36.4	383	4.47	2.67	2.77	1.01	940.5	2.19	2.36	562.5	142.8	100.5	5.72	0.82	1.71	24.8	1.71
1	8	839.346	3	72	0	25.5	12	2	3	1	0	12	1	8	5	4.71	0.78	0.39	139	6	123	6.03846	0.5	178.205	747	16.87	405	10.54	56	62.2	35.4	253	2.14	3.08	1.23	0.56	84.9	2	1.85	295.5	142.6	105.1	4.45	0.77	1.16	21.9	1.16
1	11	590.923	2	61	1	19.3	12	2	3	0	0	7	1	6	5	5.01	1.56	0.34	184	7.11	106	3.21154	0.217949	117.949	1174	41.61	495	10.09	74	71.3	41.3	399	3.78	4.38	2.26	0.85	1098.9	2.69	2.7	117.9	138.6	98.5	4.3	0.89	2.82	19.5	2.82
1	16	1185	4	72	1	21.8	15	2	3	0	0	9	3	17	16	4.74	0.76	0.33	190	6.09	105	6.23684	0.434211	250	870	25.7	229	7.85	90	64.5	38.4	278	5.91	3.97	3.62	1.2	736.7	1.92	2.45	587.4	131.2	94.3	4.68	0.96	2.85	17.9	2.85
1	10	546.923	2	76	0	26.64	12	2	3	0	0	6	1	2	7	6.32	1.56	0.42	135	8.44	97	4.05128	0.269231	86.5385	1198	28.2	419	12.75	112	76.1	38.2	288	5.26	3.56	3.57	0.85	62	2.01	3.23	1128.1	132.1	93.3	7.22	0.84	1.2	18.9	1.2
1	8	961.8	3	87	1	24	9	4	3	0	0	17	2	0	5	2.29	0.4	0.32	168	3.07	131	5.725	0.8	420	413	20.98	336	4.16	171	64.5	36.7	215	3.81	1.04	2.01	1.5	1214	2.05	1.04	1032	136.6	103.3	4.98	0.97	2.85	22.1	2.85
1	8	660.674	2	32	0	37.3	15	1	3	1	0	24	1	6	5	6.72	1.78	0.4	175	9.16	144	3.77528	0.224719	98.3146	1208	20.96	366	6.13	54	71.8	42.7	407	3.95	3.14	2.47	0.75	815.7	2.53	2.66	872.2	139.2	100.7	4.25	1.01	0.76	21.3	0.76
1	12	658.407	2	73	1	23.2	12	2	3	0	0	3	1	5	5	4	1.13	0.4	186	5.75	146	3.53982	0.353982	164.602	792	35.16	526	10.59	83	79.4	42.2	408	2.91	2.73	1.74	0.67	1060.9	2.23	3.28	243.2	130.4	90.7	5.72	0.77	0.37	16.8	0.37
1	16	1380.72	4	55	1	25.7	9	2	3	0	0	24	6	12	17	5.9	0.97	0.37	227	7.49	114	6.08247	0.381443	234.021	681	20.96	397	12.1	132	73	39.4	328	3.75	4.48	2.13	1.01	1086.5	2.01	1.79	31.9	137.9	102.9	5.43	0.81	37.61	37.61	37.61
1	8	1017.76	4	58	0	22.6	9	3	2	0	0	18	1	8	5	7.37	1.26	0.4	174	9.31	123	5.84921	0.31746	138.095	911	36.69	382	14.36	54	66.9	40.5	382	3.25	3.25	2.02	0.4	717.8	2.14	1.75	252.1	136.9	94.6	5.74	1.12	0.47	22.9	0.47
1	8	863.488	3	60	0	26.1	12	1	3	0	0	144	1	0	5	3.95	1.29	0.47	282	6.39	118	3.06202	0.364341	218.605	939	31.02	403	10.91	105	69.2	39.6	283	3.84	1.73	2.39	0.9	985.2	2.72	1.5	143.4	134.7	95.2	5.21	0.97	3.73	24	3.73
1	10	564.447	2	41	0	28.6	12	2	1	1	0	156	2	14	5	4.45	1.9	0.21	241	6.86	141	2.34211	0.110526	126.842	1140	30.39	432	9.72	92	67.4	41	388	3.47	4.01	2.07	0.66	795.7	2.17	2.25	1013.5	138	99.6	4.92	1.03	4.02	19	4.02
1	10	692.82	3	74	1	28.8	5	2	3	0	0	46	1	8	5	5.38	1.39	0.41	179	7.53	132	3.8705	0.294964	128.777	766	23.13	239	16.39	60	70.5	39.1	230	4.67	2.03	2.99	0.93	894.2	2.27	1.8	276.8	137.7	99.4	4.33	1.01	0.84	22	0.84
1	11	1128.6	4	59	1	26.8	12	2	1	0	0	45	2	14	5	4.75	1.25	0.36	297	6.45	126	3.8	0.288	237.6	1033	25.12	311	7.66	51	67	38.9	248	4.24	1.21	2.76	0.86	435.2	2.43	1.57	389.3	141.6	101.5	4.43	1.02	1.77	23.6	1.77
1	9	542.5	2	67	0	28.3	14	2	3	0	0	24	1	0	5	3.22	0.92	0.3	155	4.62	126	3.5	0.326087	168.478	730	27.55	231	6.42	74	72.7	39.4	226	2.76	1.03	1.16	1.43	1506.8	2.25	1.31	138.3	133.7	97.2	4.71	0.99	3.87	21.4	3.87
1	12	783.449	3	52	0	22.5	12	2	1	0	0	26	1	2	5	4.79	1.18	0.43	193	6.57	130	4.05932	0.364407	163.559	685	22.63	385	14.88	91	71.8	38	237	3.39	2.2	2.18	0.74	1308	2.13	1.85	324.6	136.9	101.3	4.55	1.05	0.83	21.3	0.83
1	19	1463.73	4	59	1	19.6	12	2	2	0	0	216	2	12	5	5.93	0.79	0.41	195	7.63	116	7.50633	0.518987	246.835	1115	28.94	391	8.51	69	71	38.7	357	2.58	1.61	1.35	0.87	250.9	1	1.82	228.5	139.4	100.7	5.34	0.98	2.31	22	2.31
1	8	1627.45	4	50	1	24	9	3	1	1	0	228	3	2	11	5.13	0.87	0.31	276	6.51	122	5.89655	0.356322	317.241	752	20.79	403	7.01	65	73.6	38.3	313	4.24	2.71	2.55	1.04	519.7	2.4	1.34	1.3	139.1	101.9	3.86	1.2	22.17	20.4	22.17
1	14	921.219	3	45	0	22.2	12	2	1	0	0	7	3	11	5	4.52	1.05	0.32	214	6.16	117	4.30476	0.304762	203.81	503	20.61	465	5.49	80	66.4	38.2	287	3.31	0.94	1.83	1.08	36.7	1.95	1.45	565.4	142.2	110	4.03	1.13	0.82	22.1	0.82
1	13	673.916	2	56	1	20.7	9	2	1	0	0	216	2	6	5	4.89	1.19	0.51	164	6.71	127	4.10924	0.428571	137.815	1126	37.23	290	5.79	91	73.4	41.4	315	3.19	2.23	1.91	0.75	760.4	2.43	2.46	208.9	141.6	98.8	4.73	1.24	20.9	24.2	20.9
1	10	2497.78	4	48	0	32.7	9	2	1	0	0	18	2	7	5	8.44	0.74	0.52	219	9.97	100	11.4054	0.702703	295.946	1339	34.78	370	6.83	76	67.8	44.5	431	3.07	4.72	1.75	0.67	1478.8	2.04	2.6	716.9	139.6	104.9	6.02	1.2	1.3	17.7	1.3
1	11	889.211	3	49	0	25.2	15	2	3	0	0	50	1	5	5	3.27	0.57	0.33	155	4.28	113	5.73684	0.578947	271.93	741	34.74	430	6.62	99	68.6	38.8	230	2.83	0.59	1.39	1.28	802.9	2.36	2.58	236.8	135.6	100.1	5.5	0.82	9.75	18.1	9.75
1	13	478.319	1	58	1	17.3	12	2	2	0	0	22	2	11	11	4.05	1.16	0.33	137	5.26	139	3.49138	0.284483	118.103	933	24.69	277	3.74	68	68.5	41.7	436	3.62	2.54	2.15	0.89	1563.6	2.57	0.75	150.2	137.6	95.5	5.41	1	0.2	25.2	0.2
1	14	1100.5	4	45	1	25.4	14	2	3	0	0	3	1	16	15	5.27	1.02	0.52	213	7.07	71	5.16667	0.509804	208.824	521	18.89	591	4.9	61	77.2	61	229	3.73	1.22	2.21	1.03	122	2.06	2.38	554.1	137.4	108.2	4.89	0.88	13.97	13.97	13.97
1	11	1148.47	4	53	1	23.5	13	4	1	0	0	50	6	7	5	3.38	0.93	0.51	316	5.24	68	3.63441	0.548387	339.785	781		408	11.01													135.5	102.4	4.81			22.6
1	18	1521.67	4	69	0	25.5	9	2	3	1	1	36	1	7	5	5.5	0.9	0.6	249	7.2	132	6.11111	0.666667	276.667	1227.9	37.63	513.1	9.6	139.9		38.4	366.9	4.58	1.89			187.09	2.15	3.09	1388.74	139.7	98.3	4.97	1.12		21.5
1	15	696	3	54	1	23.2	12	2	2	0	0	108	1	5	11	5.8	1.1	0.4	132	7.7	116	5.27273	0.363636	120	1129.7	41.22	599.2	10.62	100.1		39.2	453.4	5.98	5.99			248.16	2.4	2.73	653.52	138.5	97.2	4.61	1.42		19.9
1	18	1326	4	74	1	18.4	5	2	1	0	0	6	1	20	5	5.1	0.6	0.5	156	6.3	79	8.5	0.833333	260	396.8	15.73	146.2	10.09	125.3		36	17.9	2.57	0.82			1500	2.52	1.86	542.23	135.7	95.52	4.7	0.93		28.4
1	10	1630.2	4	56	1	24	12	2	3	0	0	6	1	6	11	3.3	0.5	0.4	247	4.6	109	6.6	0.8	494	964	39.96	449.8	5.59	69.5		37.2	258.3	3.19	3.37			600.57	2.25	2.12	424.84	138.2	98.6	5.89	1.14		20.3
1	13	1066.15	4	67	1	28.1	12	2	1	0	0	13	1	9	5	6.3	1.3	0.6	220	8.3	109	4.84615	0.461538	169.231	681.7	23.52	378.3	12.66	140.3		35.9	299.6	3.71	2.84			1307.87	2.08	1	335.82	134.4	100.2	5.11	1.01		20.9
1	16	1674	4	63	0	23.2	12	2	3	1	1	26	1	12	5	9.3	1.4	0.8	252	11.9	121	6.64286	0.571429	180	1182	27.94	454	6.94	57.7		38.5	301.5	2.75	1.55			294.67	2.56	1.53	23.52	140.7	104.2	4.7	1.28		22.8
1	10	918	3	54	0	26.1	9	2	1	1	0	12	1	15	5	5.1	0.9	0.5	162	6.8	109	5.66667	0.555556	180	809.2	25.14	528.1	22.79	124.5		35.7	207.2	5.35	8.3			479.84	1.78	2.12	225.45	131.3	94.8	4.02	1.04		19.2
1	13	458.7	1	86	1	19.6	5	2	3	0	0	54	6	20	5	3.3	1	0.4	139	5	116	3.3	0.4	139	810.3	28.57	371.6	6.7	110.6		39.8	265.3	4.98	1.74			894.53	2.29	1.89	633.94	142.2	105.5	5.33	1.2		20.5
1	21	3169.88	4	74	1	21.3	0	4	3	0	0	12	1	21	5	10.7	0.8	0.9	237	12.5	77	13.375	1.125	296.25	678.7	23.85	478.6	21.04	135.3		30.9	94.8	4.22	0.97			461.22	1.81	1.95	252.23	128.5	92.6	4.18	1.02		21.5
1	16	1082.4	4	70	0	20.5	9	2	3	0	1	156	2	13	5	4.1	0.5	0.4	132	5.1	111	8.2	0.8	264	1173.3	29.8	440.9	7.2	83.8		36.7	242.5	2.53	1.89			165.6	1.89	2.56	253.51	138.8	102.7	4.79	0.97		18.1
1	8	1206.5	4	59	0	25.7	5	2	3	0	0	72	1	6	14	5.7	1.2	0.6	254	8.2	114	4.75	0.5	211.667	1044	27.28	466.5	6.82	105.1		39.6	34.9	2.74	3.37			1125.02	1.89	1.89		136.6	95.1	4.87	1.08		22.2
1	12	616.4	2	65	0	25.4	9	2	3	1	0	58	1	12	5	4.6	1	0.3	134	6.1	121	4.6	0.3	134	1330.2	39.02	561.2	13.55	57.7		42.8	425.9	3.82	2.08			110.87	2.6	1.76	123.09	137.1	93.1	3.56	1.26		21.2
1	8	1176	4	61	0	22.5	9	2	3	0	0	4	1	3	5	4.9	0.7	0.9	168	6.7	66	7	1.28571	240	505	19.31	239.6	3.49	51.1		27	13.8	3.07	2.08			129.78	2.03	0.97	72.97	135	99.05	4.33	0.75		28.1
1	6	1006.58	4	66	0	22.9	12	2	3	0	0	96	2	0	5	4.7	1.2	0.5	257	7	122	3.91667	0.416667	214.167	721.7	20.89	344.9	11.61	97.2		35.6	228.7	3.74	1.64			459.55	2.59	1.9	62.13	136.6	97.8	4.89	1.04		21.8
1	16	752.6	3	52	1	18.7	15	2	2	1	0	204	2	12	22	7.1	1.5	0.5	159	10.3	114	4.73333	0.333333	106	1061.7	41.08	554.3	7.79	170		37.4	449.7	6.05	1.33			37.61	1.93	1.81	371.03	134	93.5	5.21	1.04		20.7
1	15	1091.36	4	38	0	30.2	16	2	1	1	0	90	6	12	20	9.8	2.2	1	245	13.5	122	4.45455	0.454545	111.364	1266.5	23.22	561.8	4.02	295.2		35.6	366.9	2.46	2.73			236.36	2.34	1.83	2958.49	132.2	93.8	3.97	0.95		24
1	10	454.929	1	45	1	20.5	15	2	3	0	0	42	2	7	15	3.3	1.4	0.3	193	5.4	115	2.35714	0.214286	137.857	1379.2	41.55	629.6	7.4	38.2		39.1	493.3	4.88	1.7			494.99	2.71	3.46	705.95	135.3	95.8	5.87	1.43		20.2
1	17	840.5	3	57	0	27.3	15	2	3	1	0	14	2	14	5	4.1	0.8	0.5	164	6.4	109	5.125	0.625	205	1224.2	25.81	477.5	5.54	43		42.1	340.7	3.78	0.91			149.79	2	2.27	237.9	139	100.9	4.88	1.08		21.4
1	9	963.934	3	47	0	29.9	9	2	3	1	0	120	3	9	17	5.25	1.22	0.4	224	7.48	133	4.30328	0.327869	183.607	1434	27.9	486	4.9	67.9		46.3	400	3.89	3.31			241.4	2.35	2.81	47.9	141.6	100.1	4.89	1.06		22.8	9.73
1	9	864.56	3	62	0	21.7	12	2	2	0	0	144	2	3	5	4.28	1	0.39	202	5.8	114	4.28	0.39	202	954	25.5	518	7	47.9		41.6	362	3.58	2.19			280.8	2.26	1.6	563.2	138.7	99.1	5.78	1.06		25.4	2.59
1	10	439.683	1	61	0	23.6	6	2	1	0	0	60	3	4	5	4.63	1.39	0.39	132	6.66	129	3.33094	0.280576	94.964	926	25.9	352	5.8	85.9		45	259	3.47	3.39			359.1	2.14	2.23	260.2	139.4	102.7	5.96	1.32		20.5	6
1	8	686.4	2	68	1	22.2	5	2	2	0	0	13	2	0	5	5.72	1.2	0.44	144	7.43	118	4.76667	0.366667	120	718	23.6	277	6.8	77.4		42	368	2.73	1.63			389.1	2.54	1.47	352.6	136.6	104.4	5.24	1.23		18.9	5.02
1	10	365.699	1	64	1	25.8	12	2	3	0	0	14	1	3	12	2.93	1.33	0.3	166	4.81	122	2.20301	0.225564	124.812	612	21.1	427	15.2	84		38.1	238	4.8	1.78			390.1	2.28	1.44	206.4	137	103.1	4.66	1.24		19.9	0.66
1	8	883.105	3	51	0	27.4	8	2	1	1	0	24	1	3	5	5.24	1.43	0.37	241	7.27	100	3.66434	0.258741	168.531	841	18.9	429	21.5	87.9		44.2	327	3.3	4.06			300.6	2.26	1.59	330.8	139.2	102.7	5.42	1.19		21.9	15.53
1	11	462.636	1	56	0	22.5	5	2	1	1	0	60	1	1	5	3.73	1.29	0.35	160	5.49	131	2.89147	0.271318	124.031	706	17.5	304	20.5	116.5		42.1	266	3.13	1.98			97.3	2.19	1.69	164.7	138.4	106.6	5.59	1.14		17.7	0.59
1	10	1177.43	4	51	0	22.5	12	2	1	1	0	204	6	4	5	6.31	0.97	0.43	181	7.99	134	6.50516	0.443299	186.598	1047	26.9	468	7.2	79.5		43.6	333	3.5	2.56			360.9	2.19	1.93	35.3	140.4	98.7	4.47	1.07		22.2	3.11
1	8	846.096	3	63	0	26.6	12	2	3	0	1	48	2	4	5	5.05	1.14	0.44	191	6.99	125	4.42983	0.385965	167.544	1044	27.5	445	9.6	125.7		41.1	351	3.36	1.91			134.3	2.12	1.69	278.6	142.6	102.7	4.55	1.18		23.9	3.54
1	9	325.5	1	74	1	28.5	5	4	1	0	0	192	6	0	8	2.73	1.04	0.19	124	4.05	101	2.625	0.182692	119.231	699	15.3	328	5.9	49.5		42.4	370	4.32	1.52			694.5	2.11	1.17	67.1	141.7	106.1	5.22	0.92		21.7	3.83
1	12	773.667	3	71	0	27.7	9	2	3	0	0	78	6	8	5	4.07	1.11	0.33	211	5.9	117	3.66667	0.297297	190.09	813	12.6	399	7.3	119.2		42.2	363	4.64	1.63			126.4	2.41	1.6	284.2	138.7	100.6	4.77	1.1		23.3	7.95
1	9	674.191	2	59	0	25.5	12	2	1	0	0	108	6	4	5	4.97	1.15	0.54	156	6.74	113	4.32174	0.469565	135.652	1142	23.2	390	5.6	95.8		39.9	422	3.84	1.05			422.2	1.98	1.99	319.4	140.1	103	3.9	1.04		19.2	1.26
1	9	467.062	1	59	0	22.1	7	2	1	0	0	108	6	0	5	2.82	0.96	0.33	159	4.22	126	2.9375	0.34375	165.625	784	28.2	443	6.9	73.6		39.7	305	3.11	0.83			230.7	2.12	1.94	199.6	136.6	96.9	5.88	1.14		23.4	1.95
1	12	372.101	1	74	1	22.2	5	2	1	0	0	240	2	2	5	2.26	0.99	0.35	163	3.71	119	2.28283	0.353535	164.646	818	24	404	11.5	115.3		42.3	347	3.7	1.33			389.5	2.34	1.26	14.3	139.8	100	4.46	1.16		23.4	0.43
1	16	841.75	3	58	0	27	9	2	1	0	0	96	1	13	5	4.81	1	0.39	175	6.6	129	4.81	0.39	175	942	24.3	445	24.8	111.5		45.7	386	2.21	1.91			240.7	2.06	1.59	260.5	134.6	96.3	5.66	1.11		22.8	2.34
1	8	561.716	2	55	0	26.8	9	2	3	1	0	30	2	6	5	4.22	1.48	0.35	197	6.68	119	2.85135	0.236486	133.108	1145	22.5	414	7.6	78.9		41.2	318	3.35	1.96			247.5	2.46	0.84	208.7	139.7	103.3	5.28	1.19		22.9	13.86
1	11	517.647	2	56	0	24.9	7	2	1	0	0	84	1	5	5	3	0.51	0.38	88	4.02	129	5.88235	0.745098	172.549	1010	29.1	454	7.1	78.7		38.7	41.2	2.92	0.89			290.7	2.39	2.02	374	138.9	101.1	4.39	1.07		22.5	1.7
1	11	687.233	3	69	0	19.5	8	2	3	0	0	120	2	4	5	3.89	0.6	0.39	106	5.47	141	6.48333	0.65	176.667	964	22.4	441		91.2		35.6	369	3.74	1.12			118.6	2.16	1.7	95.5	138.7	102.5	4.68	1.14		24.1	1.85
1	9	1073.43	4	78	1	22.8	9	4	2	0	0	242	2	6	5	4.99	0.86	0.72	185	6.73	125	5.80233	0.837209	215.116	713	31.5	344	13.8	88.4		40.7	325	3.39	2.29			379.8	2.31	1.36	100.7	139.6	99.3	4.66	1.07		20.8	7.49
1	14	698.283	3	56	1	25.6	12	2	3	0	1	8	3	10	5	4.98	0.92	0.35	129	6.57	127	5.41304	0.380435	140.217	769	28.6	435		84.6		42.3	244	3.68	5.97			573.5	2.18	1.59	201.3	138.4	106.8	5.07	1.6		18.6	16.05
1	9	1390.86	4	57	0	25.3	9	2	3	1	0	60	6	2	5	6.91	2.34	0.52	471	10.06	124	2.95299	0.222222	201.282	1085	22.3	376	8.6	100.7		42.2	496	4.91	7.03			235.6	2.12	1.37	148.6	139.1	100.7	4.79	1.21		19.7	5.46
1	13	1045.9	4	57	0	26.8	9	2	3	1	0	120	2	8	5	6.29	0.86	0.49	143	7.94	125	7.31395	0.569767	166.279	991	25.8	400	6.2	53.5		40	326	2.76	4.29			338.3	2.02	1.2	19.4	137.6	100.3	5.01	1.09		23.4	20.5
1	9	397.169	1	41	0	20.1	16	2	3	0	0	7	2	1	5	3.26	1.42	0.23	173	5.26	99	2.29577	0.161972	121.831	824	16.2	396	8.3	55.6		43.8	389	2.53	1.24			227.3	2.39	0.74	120.3	138.4	101.7	4.4	0.97		28.7	0.46
1	15	767.464	3	61	1	24.1	12	2	1	0	0	96	2	1	5	6.23	1.38	0.76	170	8.62	124	4.51449	0.550725	123.188	800	19.8	402	6.2	97.5		41	438	4.92	2.39			332.1	2.42	1.41	369	143.3	101.7	4.9	1.12		26	1.86
1	14	503.037	2	66	1	21.4	12	2	2	0	0	66	2	11	5	2.47	0.82	0.35	167	3.83	126	3.0122	0.426829	203.659	831	22.2	461	6.3	81.4		40.7	252	3.36	1.32			275	2.46	2.35	456.8	138.9	101.5	5.02	1.31		24.4	1.36
1	11	786.199	3	35	0	27.6	15	1	3	1	0	36	2	2	5	11.38	3.72	0.83	257	14.24	116	3.05914	0.223118	69.086	1118	29.2	585	8	82.2		43.1	412	3.25	3.65			378.8	2.37	1.91	110.3	138.3	96.2	3.86	1.18		23.8	3.41
1	15	375.165	1	76	1	27	5	2	1	0	0	24	1	14	5	4.46	1.7	0.57	143	6.96	123	2.62353	0.335294	84.1176	608	22.2	320	18.9	112.9		34.3	243	3.19	1.4			260.9	2.15	1.07	134.3	134.6	101.7	5.04	1.05		22.2	0.23
1	8	715.745	3	42	0	22.9	9	2	1	0	0	66	6	5	22	4.86	1.1	0.33	162	6.52	131	4.41818	0.3	147.273	1305	23	456	8.7	145.7		42.8	448	4.89	4.38			195.7	2.45	1.58	277.2	140.6	101.4	4.14	0.97		24	3.46
1	15	569.379	2	57	0	24.3	5	2	1	0	0	26	1	5	5	4.48	2.03	0.48	258	7.14	116	2.2069	0.236453	127.094	634	20.7	335	13	83.8		38.8	334	2.22	1.2			283.7	2.24	0.97	207.3	136.8	104	4.43	1		21.1	2.93
1	10	607.541	2	59	0	25.3	12	2	2	0	0	108	2	8	5	4.57	1.7	0.52	226	6.99	135	2.68824	0.305882	132.941	1083	24.4	392	6.1	86.6		41.5	385	4.17	1.77			345.7	2.43	2.18	228	137.7	101.4	6.4	1.13		20.6	1.49
